# Supplementary material for: Leptin administration restores the altered adipose and hepatic expression of aquaglyceroporins improving the non-alcoholic fatty liver of ob/ob mice
Source: PubMed Central journal article supplement (PMC4498231; doi:10.1038/srep12067), 2015-07-10
Supplement: srep12067-s1.pdf [file srep12067-s1.pdf]

# Leptin administration restores the altered adipose and hepatic expression of aquaglyceroporins improving the non-alcoholic fatty liver of *ob/ob* mice

Amaia Rodríguez<sup>1,7,8</sup>, Natalia R. Moreno<sup>3</sup>, Inmaculada Balaguer<sup>1</sup>, Leire Méndez-Giménez<sup>1,7,8</sup>, Sara Becerril<sup>1,7,8</sup>, Victoria Catalán<sup>1,7,8</sup>, Javier Gómez-Ambrosi<sup>1,7,8</sup>, Piero Portincasa<sup>4</sup>, Giuseppe Calamita<sup>5</sup>, Graça Soveral<sup>6</sup>, María M. Malagón<sup>3,7</sup>, Gema Frühbeck<sup>1,2,7,8,\*</sup>

<sup>1</sup>Metabolic Research Laboratory and <sup>2</sup>Department of Endocrinology & Nutrition, Clínica Universidad de Navarra, Pamplona, Spain; <sup>3</sup>Department of Cell Biology, Physiology, and Immunology, Instituto Maimónides de Investigación Biomédica (IMIBIC)/Reina Sofía University Hospital/University of Córdoba, Córdoba, Spain; <sup>4</sup>Clinica Medica "A. Murri", Department of Biomedical Sciences and Human Oncology University of Bari Medical School, Policlinico Hospital, Bari, Italy; <sup>5</sup>Department of Biosciences, Biotechnologies and Biopharmaceutics, University of Bari "Aldo Moro", Bari, Italy; <sup>6</sup>Research Institute for Medicines (iMed.Ulisboa), Faculty of Pharmacy, Universidade de Lisboa, Lisboa, Portugal; <sup>7</sup>CIBER Fisiopatología de la Obesidad y Nutrición, Instituto de Salud Carlos III, 28029, Madrid, Spain; <sup>8</sup>Obesity & Adipobiology Group, Instituto de Investigación Sanitario de Navarra (IdiSNA), Pamplona, Spain.

## **\*Corresponding author:**

Gema Frühbeck RNutr, MD, PhD  
Dept. Endocrinology & Nutrition  
Clínica Universidad de Navarra  
Avda. Pío XII 36  
31008 Pamplona (SPAIN)  
Phone: +34 948 25 54 00 (ext. 4484)

**Supplementary table S1. Sequences of primers and TaqMan® probes.**

| Gene<br>(GenBank accession<br>no.) | Oligonucleotide sequence (5'-3')         | Nucleotide<br>s |
|------------------------------------|------------------------------------------|-----------------|
| <i>Aqp3</i><br>(NM_016689.2)       |                                          |                 |
| Forward                            | CCCTCTGGACACTTGGACATG                    | 525-545         |
| Reverse                            | TACTGGCCATCGTTGACCCT                     | 598-617         |
| Probe                              | FAM-CTTTGATCAGTTCATAGGCACA-TAMRA         | 557-578         |
| <i>Aqp7</i><br>(NM_007473.4)       |                                          |                 |
| Forward                            | TCAGTTCCTGGGCTCCTTCTC                    | 749-769         |
| Reverse                            | CCTTGGAACCTGTCACCAACA                    | 832-844         |
| Probe                              | FAM-CCACCTACTTAATTTTCTATGGTGCC-<br>TAMRA | 781-806         |
| <i>Aqp9</i><br>(NM_022026.2)       |                                          |                 |
| Forward                            | CTATGACGGACTCATGGCCTTT                   | 578-599         |
| Reverse                            | ATGAACGCCGTTCCATTTTCT                    | 626-646         |
| Probe                              | FAM-CTGATGGAAAGCTGCTC-TAMRA              | 601-617         |
| <i>Pparg</i><br>(NM_001127330.1)   |                                          |                 |
| Forward                            | GCTTCCACTATGGAGTTCATGCTT                 | 576-599         |
| Reverse                            | ATCCGGCAGTTAAGATCACACCTA                 | 655-678         |
| Probe                              | FAM-AGGATGCAAGGGTTTTTTCCGA-TAMRA         | 604-625         |

*Aqp*, aquaporin; *Pparg*, peroxisome proliferator-activator receptor  $\gamma$ .
